# Supplementary material for: External field control and characteristic quantities of Rashba spin orbit coupling in MA 2 Z 4 derived monolayer materials
Source: Royal Society of Chemistry journal article supplement (doi:10.1039/d5tc03579a), 2026-01-01
Supplement: d5tc03579a1.pdf [file d5tc03579a1.pdf]

## Supporting Information

### External field control and characteristic quantities of Rashba spin orbit coupling in $\text{MA}_2\text{Z}_4$ derived monolayer materials

Geng Yong Du,<sup>ab</sup> Gui-bo Zheng,<sup>cde</sup> Ying Xu,<sup>\*ab</sup> Wen Zhe Zhou,<sup>cde</sup> Zhi-Min Ao,<sup>f</sup> Wei Sheng,<sup>ab</sup> and Fang Ping OuYang<sup>\*cde</sup>

a.School of Physics and Electronic Science, Hunan University of Science and Technology, Xiangtan 411201, China

b.Hunan Provincial Key Laboratory of Intelligent Sensors and Advanced Sensor Materials, Xiangtan 411201, Hunan, China

c.School of Physics, Institute of Quantum Physics, Hunan Key Laboratory for Super-Microstructure and Ultrafast Process, and Hunan Key Laboratory of Nanophotonics and Devices, Central South University, Changsha 410083, China

d.School of Physics Science and Technology, and Xinjiang Key Laboratory of Solid-State Physics and Devices, Xinjiang Uni-versity, Urumqi 830046, China

e.State Key Laboratory of Powder Metallurgy, and Powder Metallurgy Research Institute, Central South University, Chang-sha 410083, China

f.Advanced Interdisciplinary Institute of Environment and Ecology, Guangdong Provincial Key Laboratory of Wastewater Information Analysis and Early Warning, Beijing Normal University, Zhuhai 519087, China

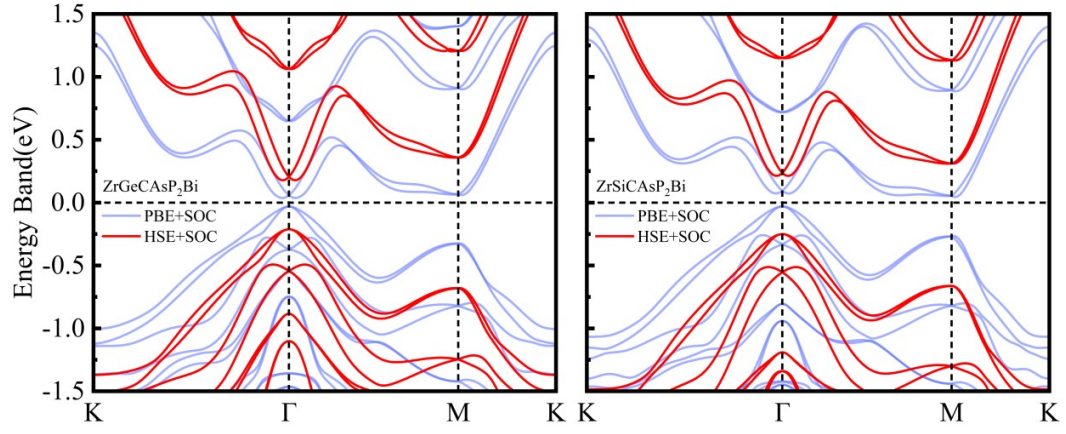

**Figure S1.** Band structures of several materials in  $\text{MA}_2\text{Z}_4$  under PBE+SOC and HSE+SOC.

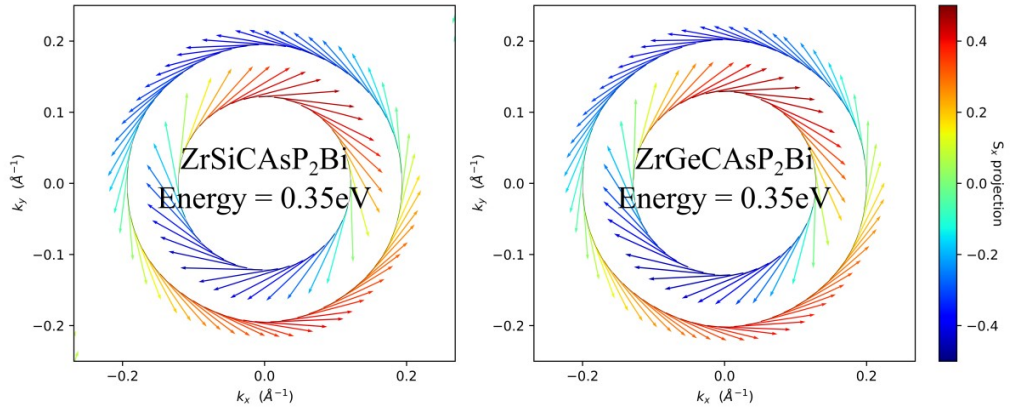

**Figure S2.** Spin texture diagrams of several materials in  $\text{MA}_2\text{Z}_4$  at their respective energies (referenced to the Fermi level).

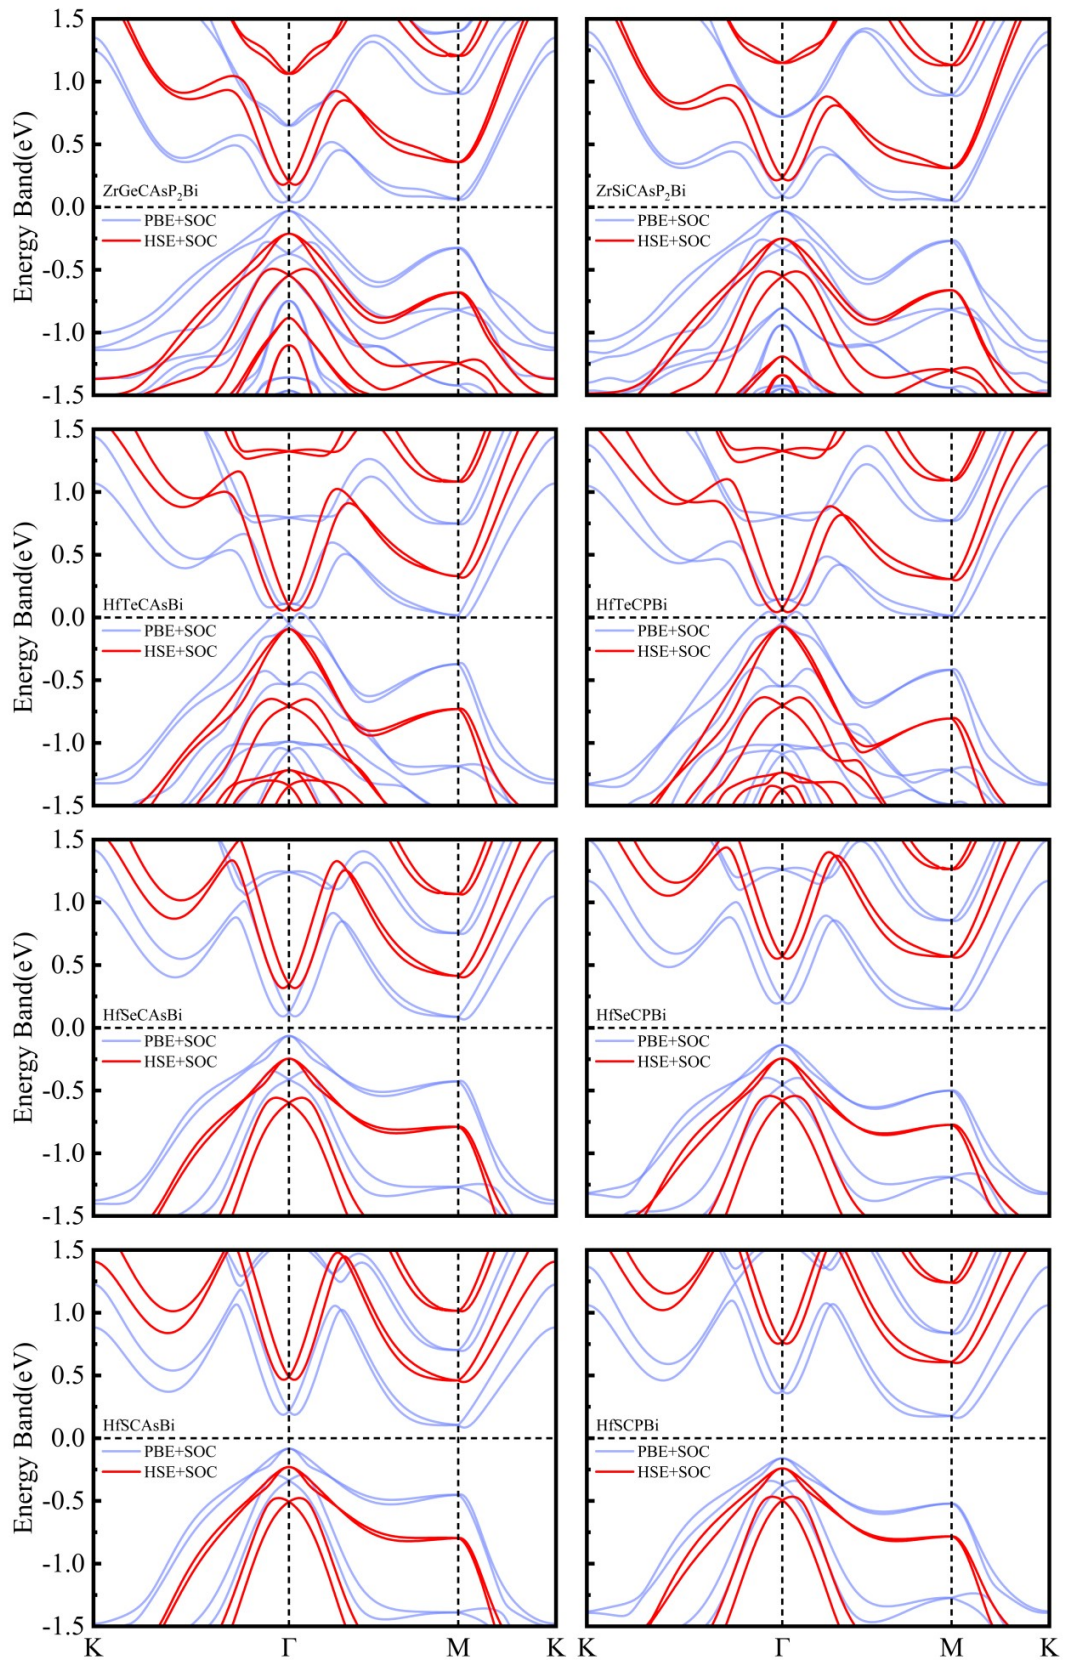



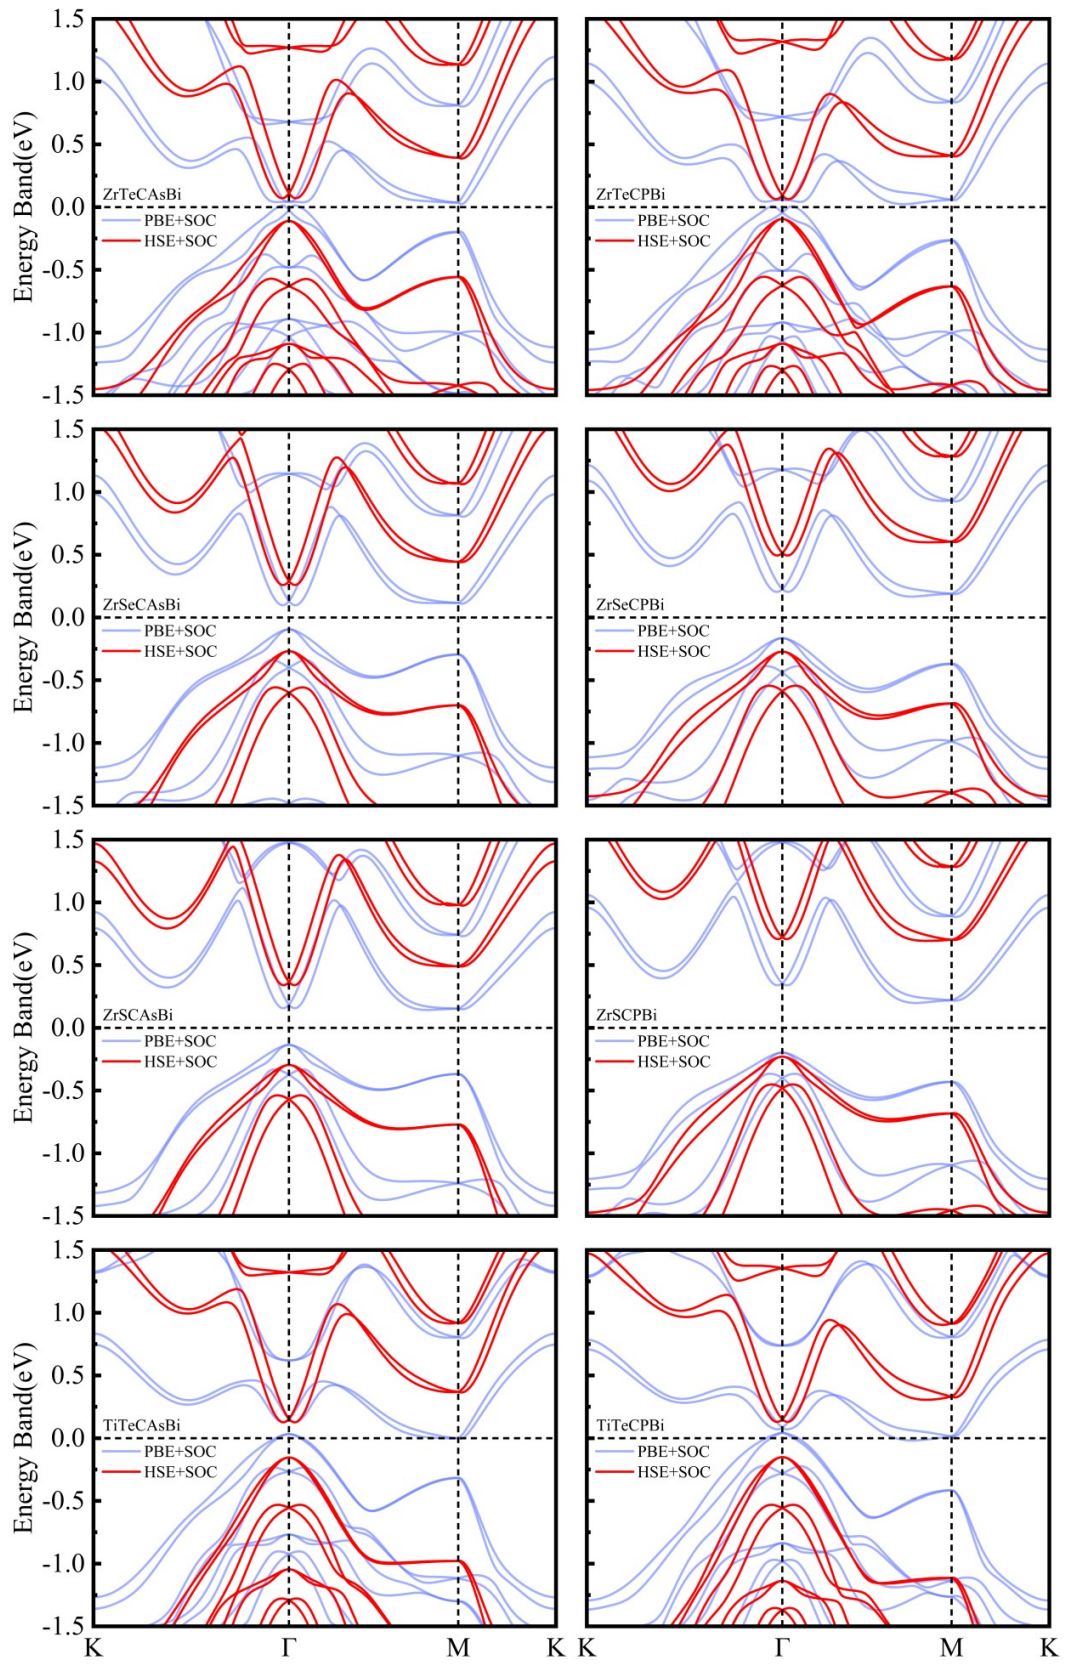

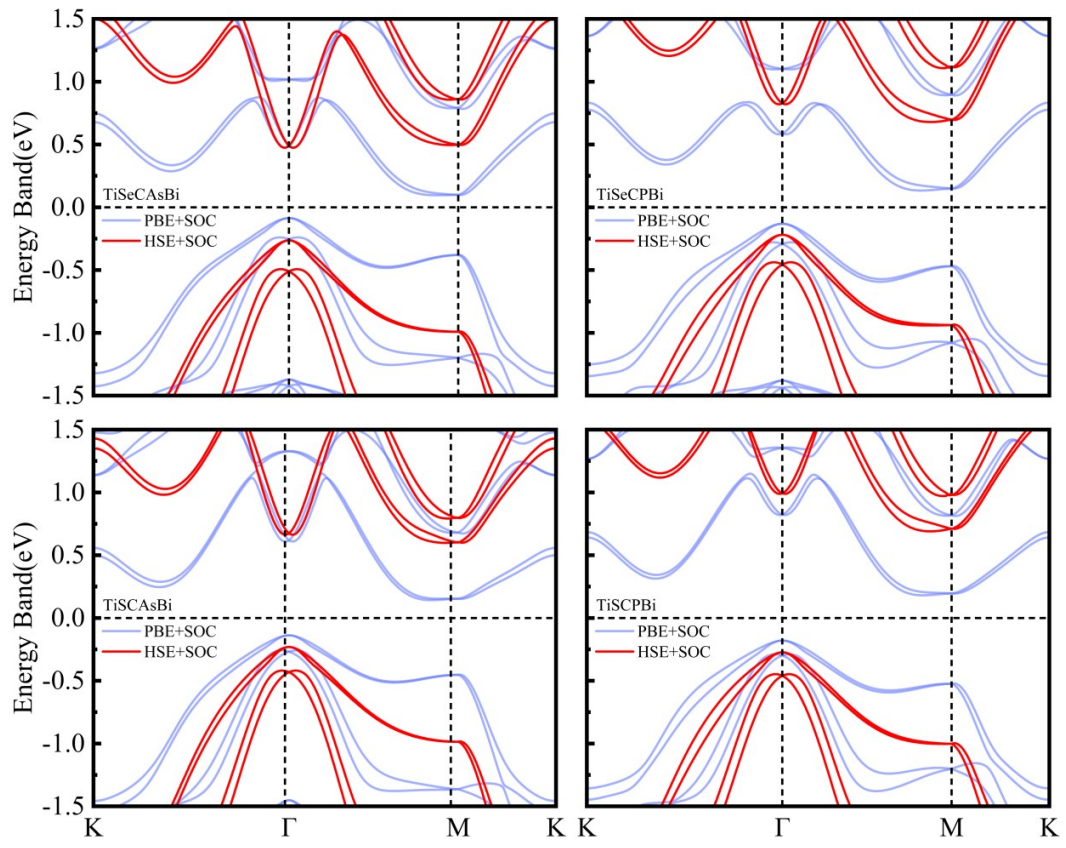

**Figure S3.** Band structures of several materials in  $\text{MXAZ}_2$  under PBE+SOC and HSE+SOC.

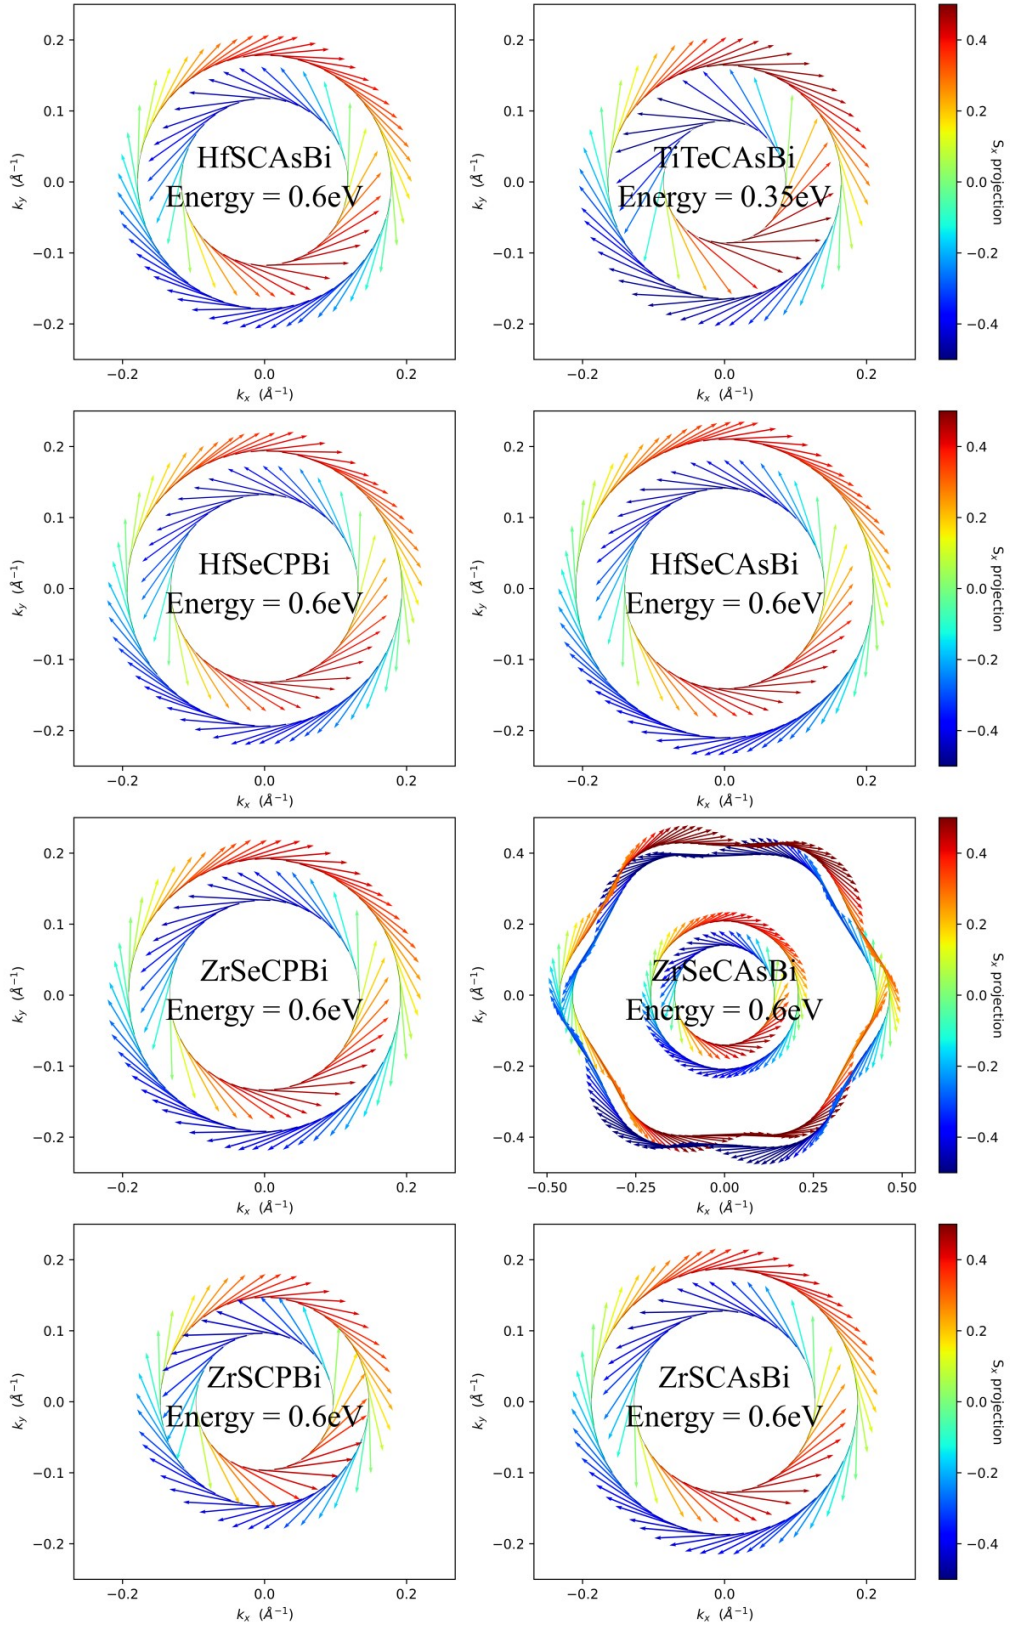



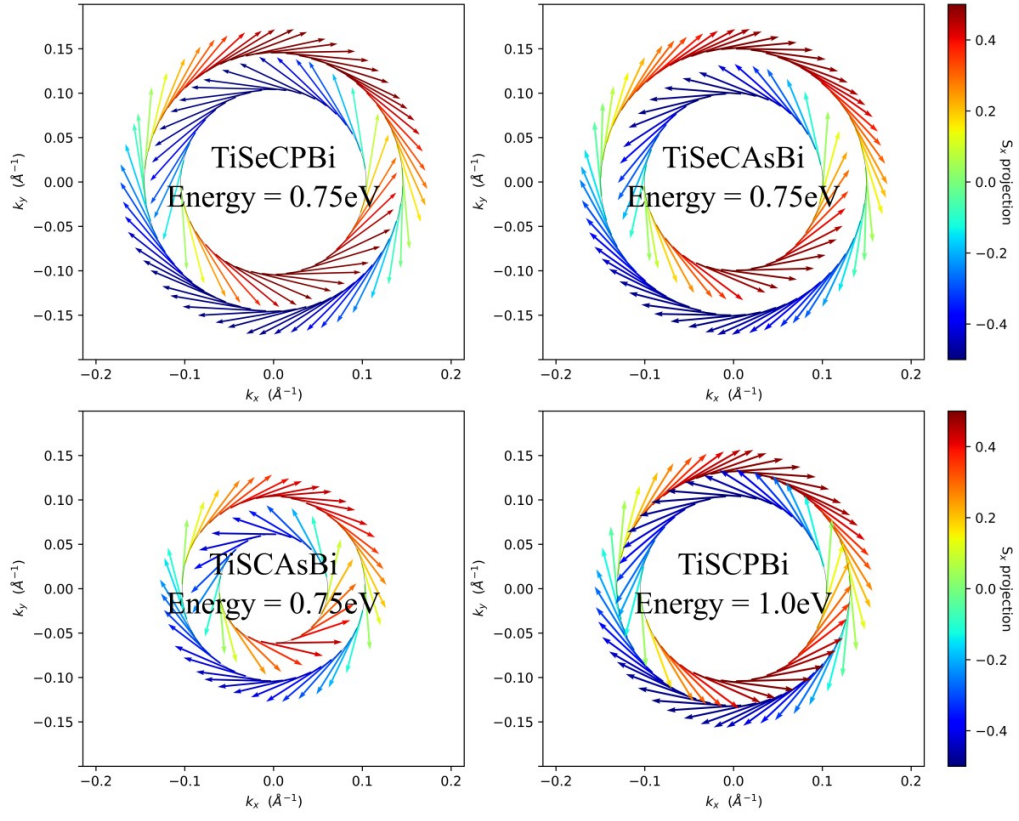

**Figure S4.** Spin texture diagrams of several materials in  $\text{MXAZ}_2$  at their respective energies (referenced to the Fermi level).

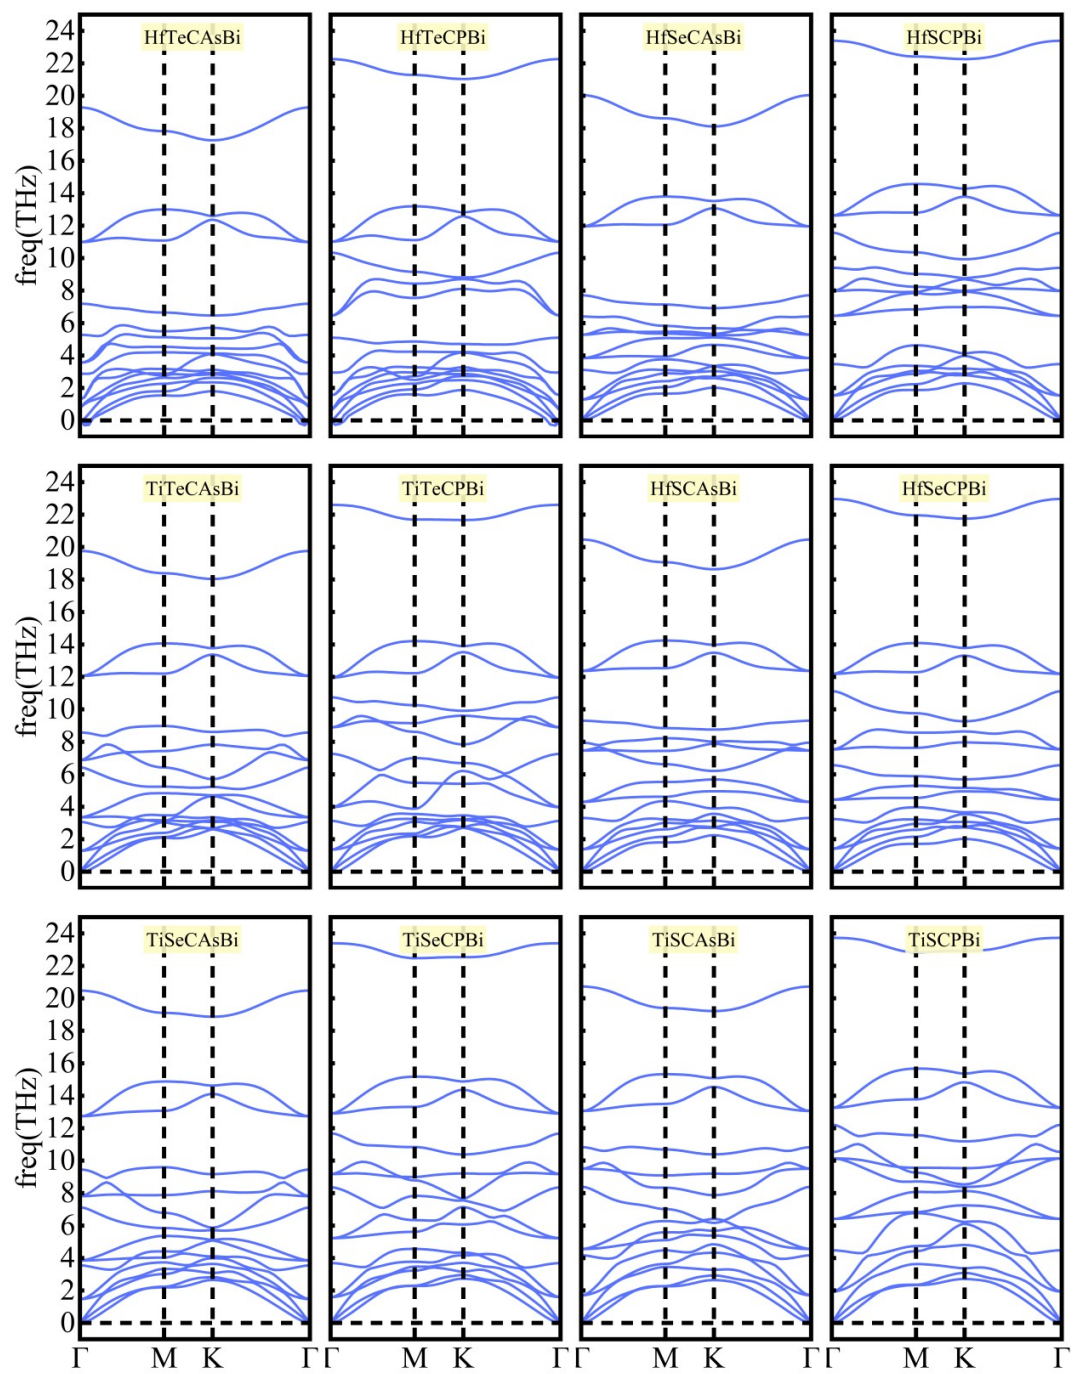



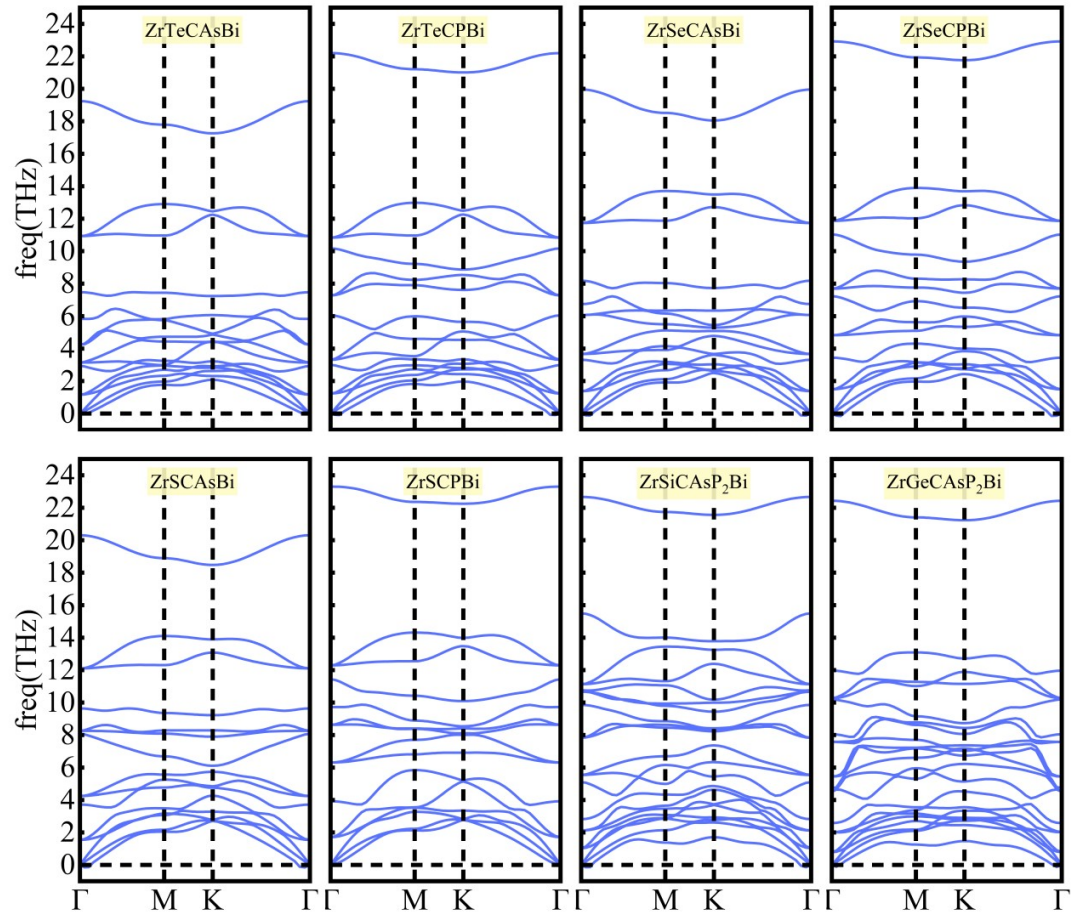

**Figure S5.** Phonon spectra of several materials in MA<sub>2</sub>Z<sub>4</sub> and MXAZ<sub>2</sub>.

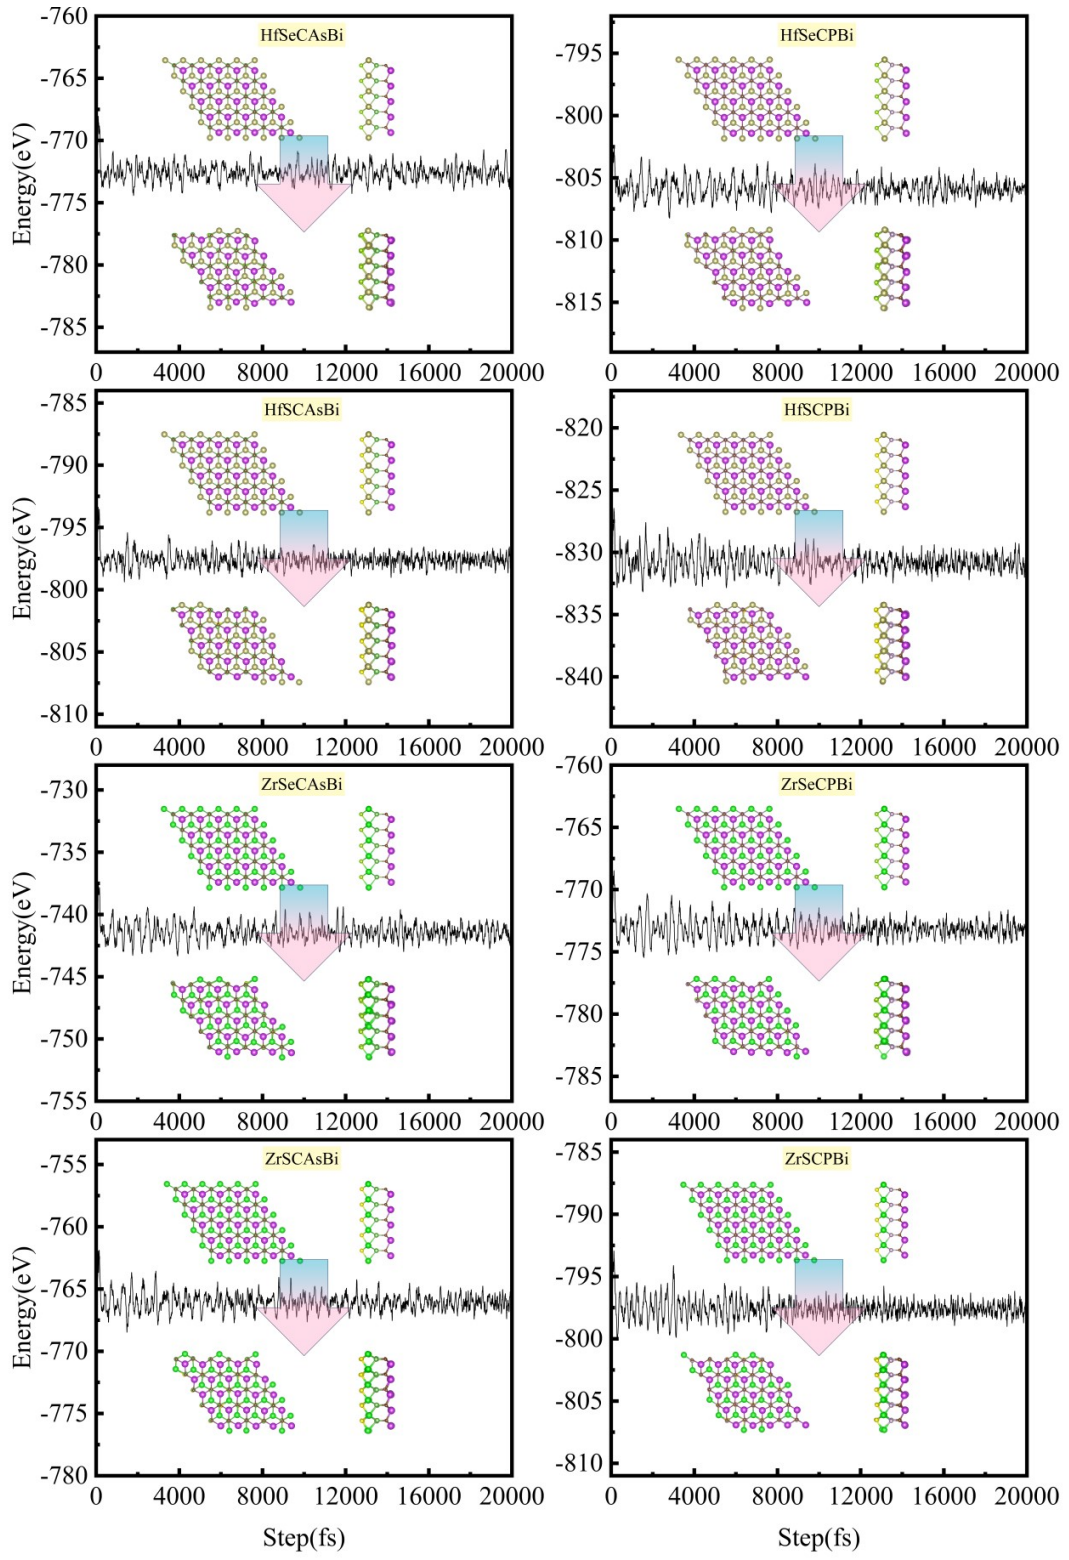

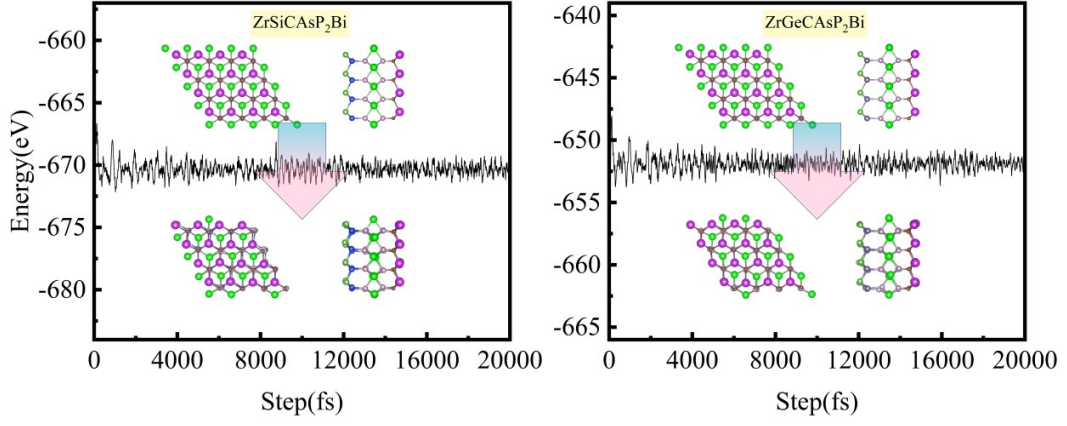

**Figure S6.** Molecular dynamics simulations of several materials in  $MA_2Z_4$  and  $MXAZ_2$  at 400K.

**TABLE S1.** The Rashba strength  $\alpha_R$  of various materials, the difference in work function between the two sides of the material  $\Delta\Phi$ , the dipole moment  $\mu$  within the material,  $Z$  represents the sum of atomic numbers, and the electronegativity  $\chi$  of atoms at different positions.

| Material  | $\alpha_R(\text{eV}\text{\AA})$ | $\Delta\Phi(\text{V})$ | $\mu(\text{e}\text{\AA})$ | $Z$ | $\chi_M(\text{kJ/mol})$ | $\chi_X(\text{kJ/mol})$ | $\chi_{Z1}(\text{kJ/mol})$ |
|-----------|---------------------------------|------------------------|---------------------------|-----|-------------------------|-------------------------|----------------------------|
| HfTeCAsBi | 2.083                           | 1.061                  | -0.0739                   | 246 | 1.30                    | 2.10                    | 2.18                       |
| HfTeCPBi  | 1.775                           | 1.268                  | -0.0865                   | 228 | 1.30                    | 2.10                    | 2.19                       |
| HfSeCAsBi | 1.847                           | 1.275                  | -0.0851                   | 228 | 1.30                    | 2.55                    | 2.18                       |
| HfSeCPBi  | 1.380                           | 1.487                  | -0.0973                   | 210 | 1.30                    | 2.55                    | 2.19                       |
| HfSCAsBi  | 1.631                           | 1.419                  | -0.0931                   | 210 | 1.30                    | 2.58                    | 2.18                       |
| HfSCPBi   | 1.144                           | 1.602                  | -0.1023                   | 192 | 1.30                    | 2.58                    | 2.19                       |
| ZrTeCAsBi | 2.072                           | 1.118                  | -0.0783                   | 214 | 1.33                    | 2.10                    | 2.18                       |
| ZrTeCPBi  | 1.749                           | 1.322                  | -0.0908                   | 196 | 1.33                    | 2.10                    | 2.19                       |
| ZrSeCAsBi | 1.849                           | 1.348                  | -0.0912                   | 196 | 1.33                    | 2.55                    | 2.18                       |
| ZrSeCPBi  | 1.346                           | 1.494                  | -0.0988                   | 178 | 1.33                    | 2.55                    | 2.19                       |
| ZrSCAsBi  | 1.668                           | 1.429                  | -0.0942                   | 178 | 1.33                    | 2.58                    | 2.18                       |
| ZrSCPBi   | 1.133                           | 1.609                  | -0.1040                   | 160 | 1.33                    | 2.58                    | 2.19                       |
| TiTeCAsBi | 1.667                           | 1.19                   | -0.0780                   | 196 | 1.54                    | 2.10                    | 2.18                       |
| TiTeCPBi  | 1.360                           | 1.341                  | -0.0860                   | 178 | 1.54                    | 2.10                    | 2.19                       |
| TiSeCAsBi | 1.253                           | 1.384                  | -0.0869                   | 178 | 1.54                    | 2.55                    | 2.18                       |
| TiSeCPBi  | 0.781                           | 1.591                  | -0.0983                   | 160 | 1.54                    | 2.55                    | 2.19                       |
| TiSCAsBi  | 1.030                           | 1.623                  | -0.0994                   | 160 | 1.54                    | 2.58                    | 2.18                       |
| TiSCPBi   | 0.552                           | 1.788                  | -0.1073                   | 142 | 1.54                    | 2.58                    | 2.19                       |



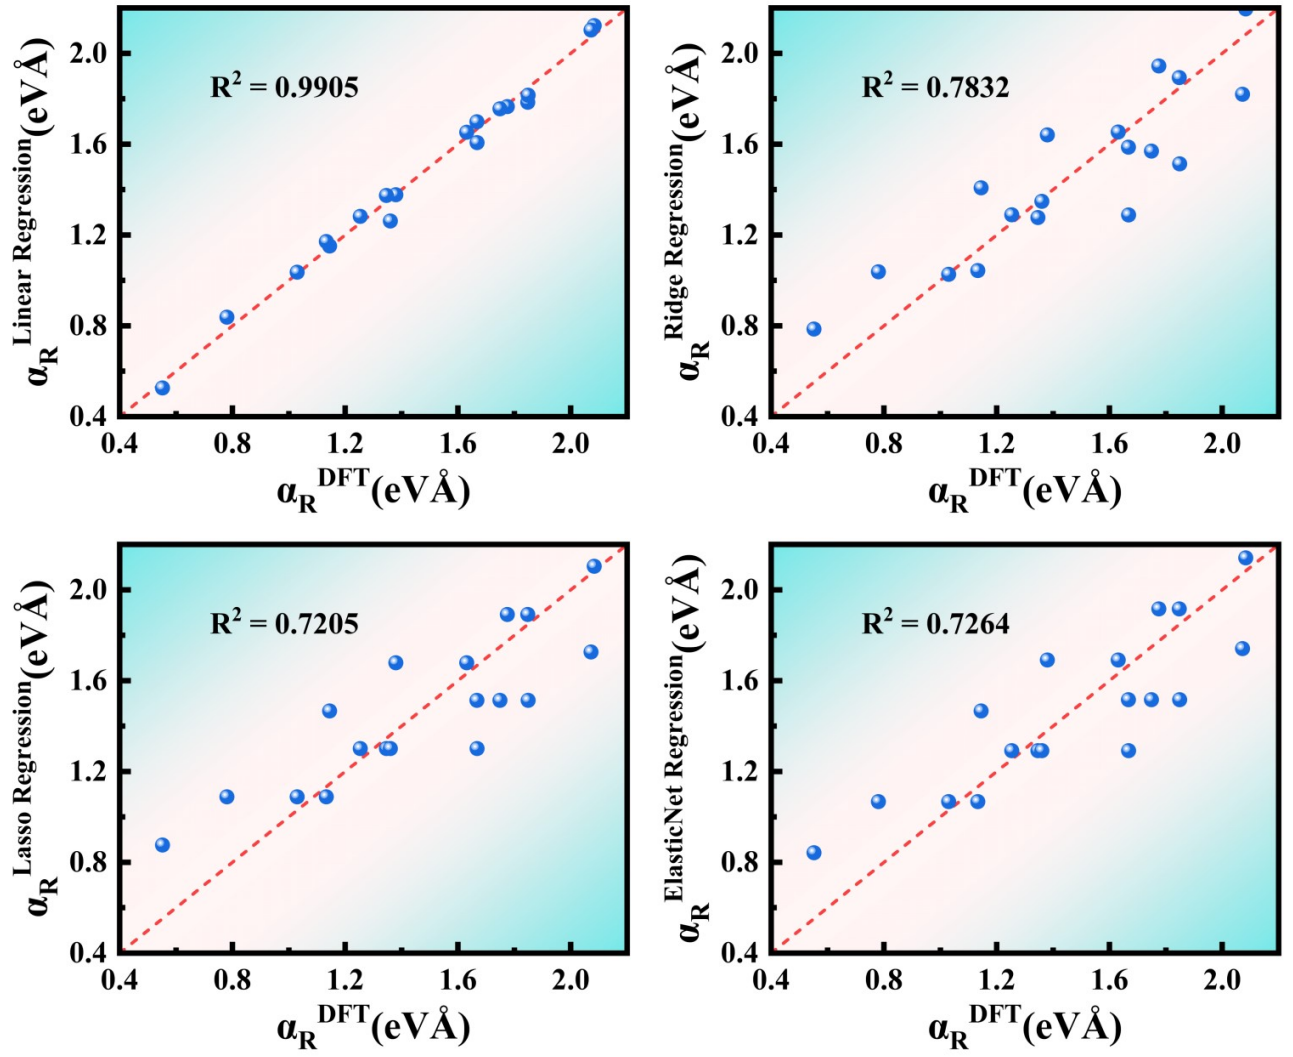

**Figure S7.** The comparison between the calculated values of Rashba spin-orbit coupling strength  $\alpha_R$  obtained from different models and the results calculated by DFT method.

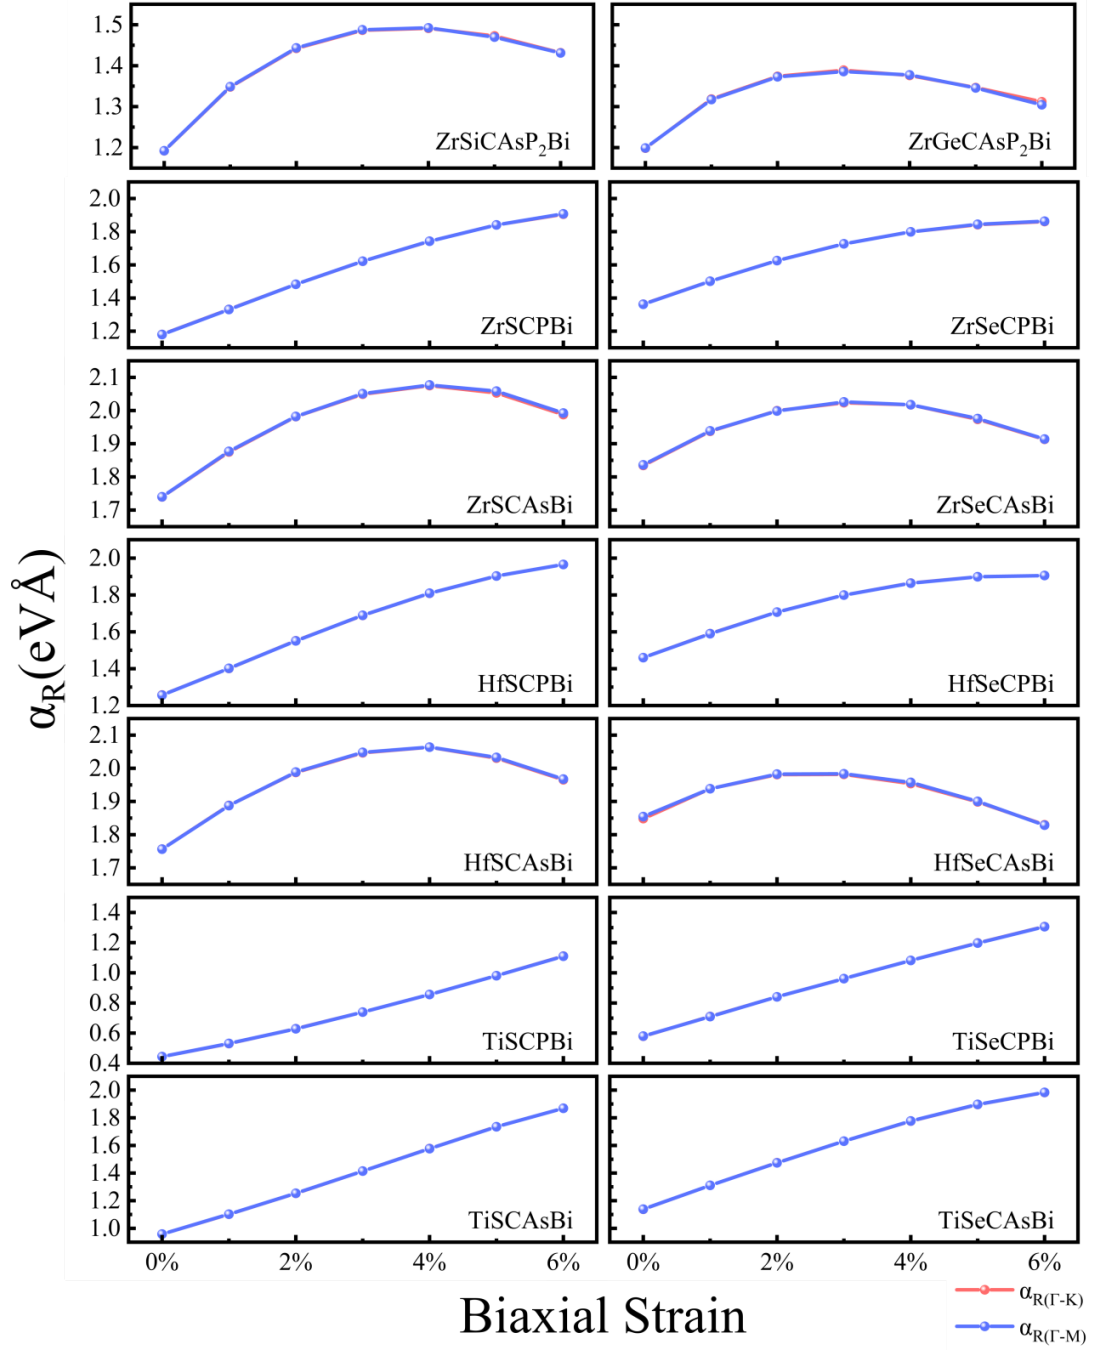

**Figure S8.** The variation of Rashba constant  $\alpha_R$  with biaxial strain for several materials in  $\text{MA}_2\text{Z}_4$  and  $\text{MXAZ}_2$  systems.

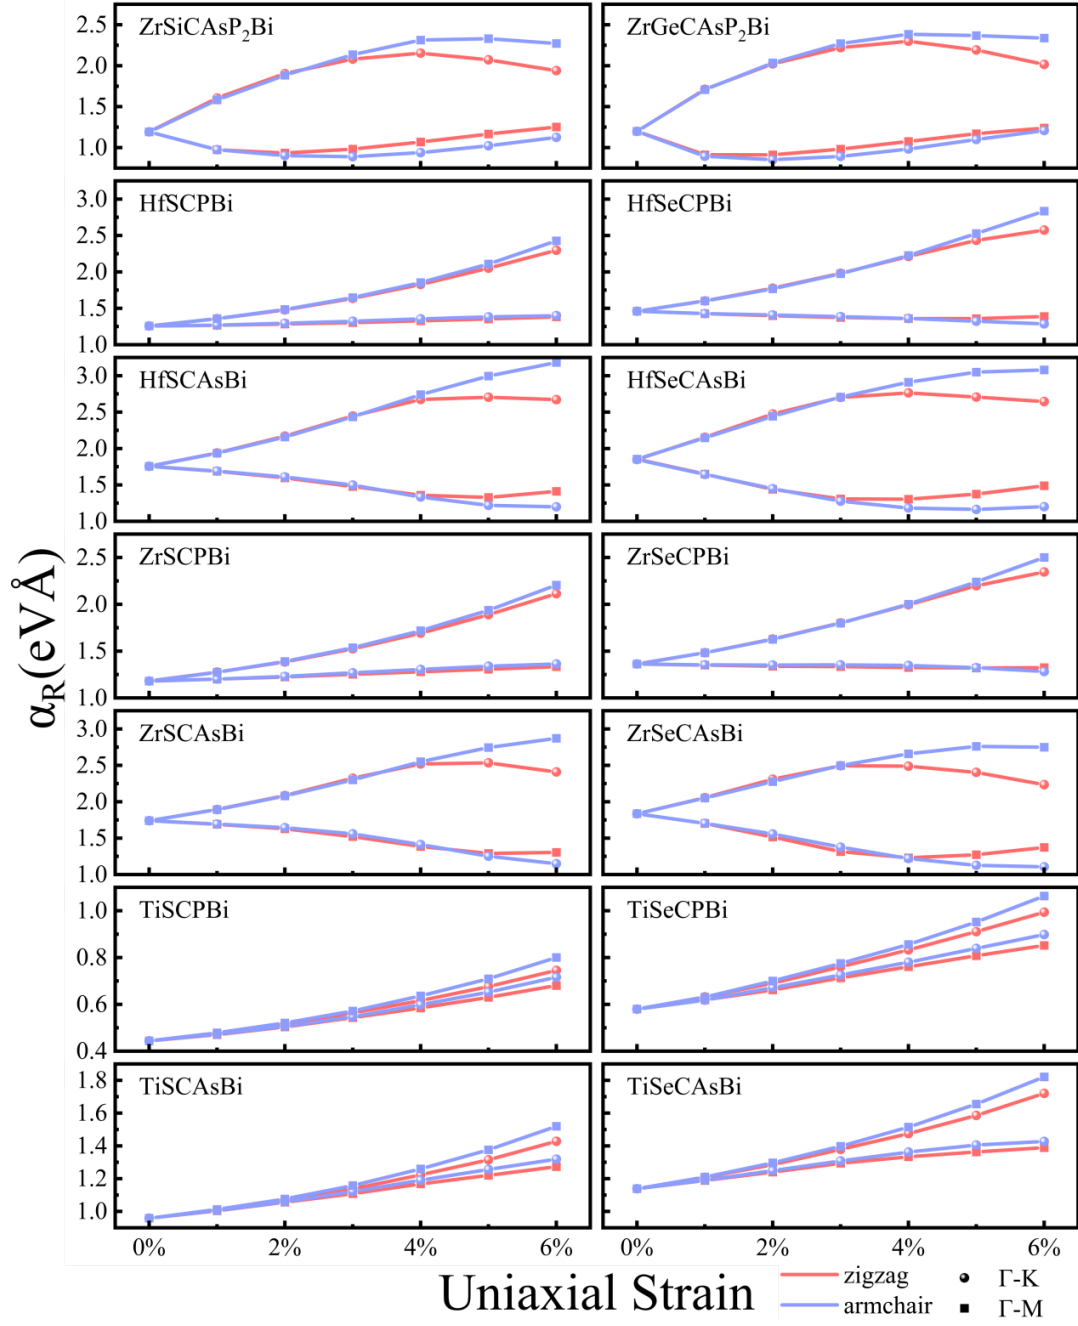

**Figure S9.** The variation of Rashba constant  $\alpha_R$  with uniaxial strain for several materials in  $\text{MA}_2\text{Z}_4$  and  $\text{MXAZ}_2$  systems.



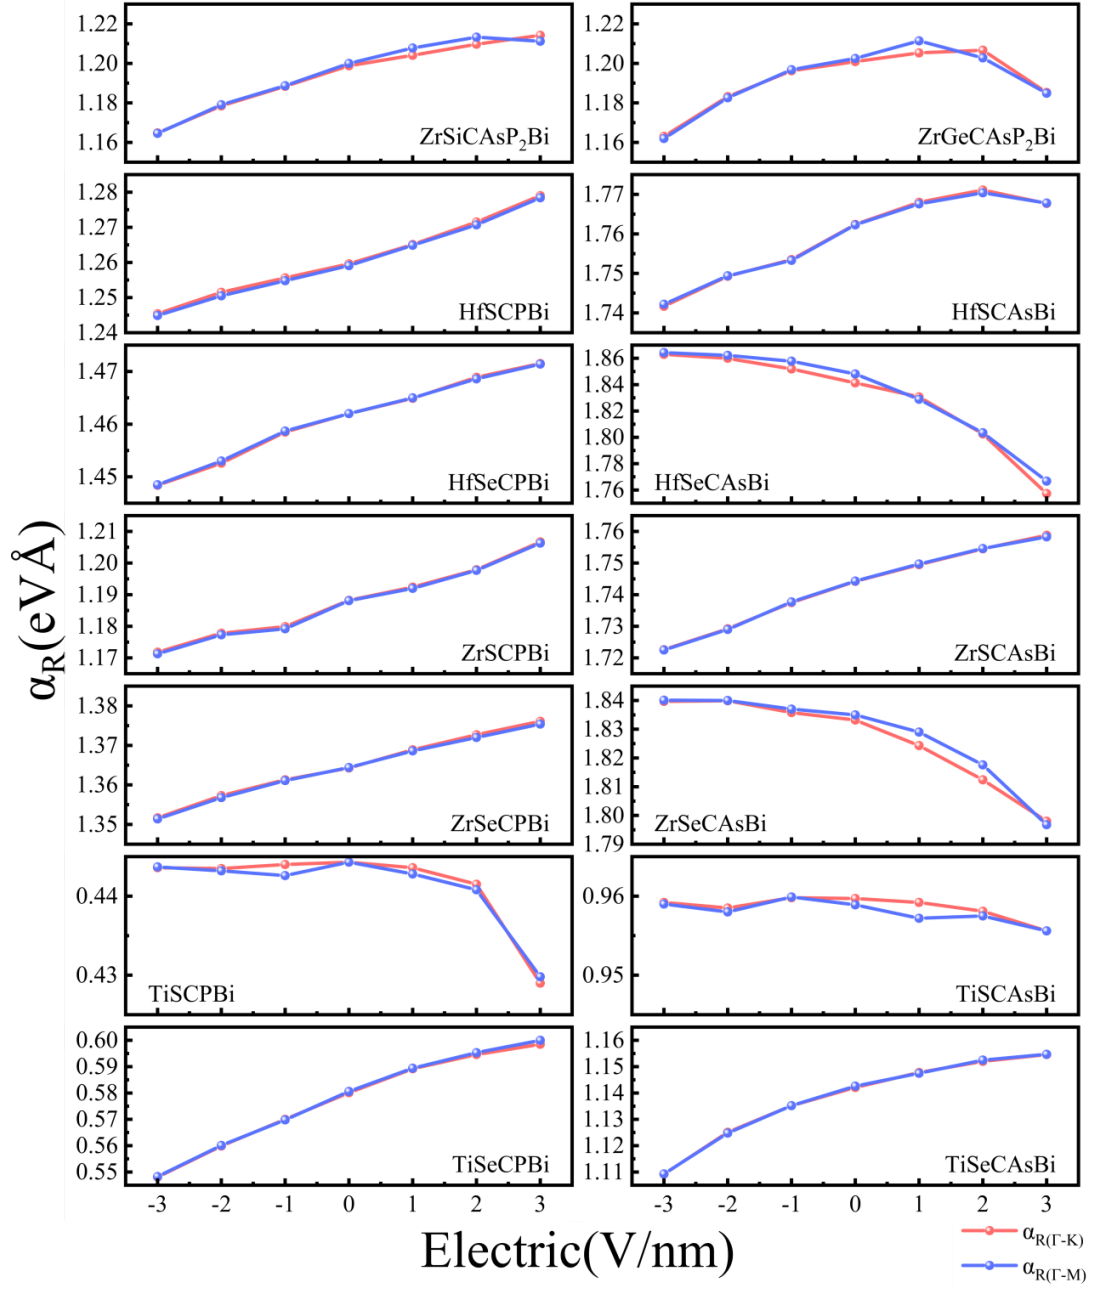

**Figure S10.** The variation of Rashba constant  $\alpha_R$  with electric field for several materials in MA2Z4 and MXAZ<sub>2</sub> systems.

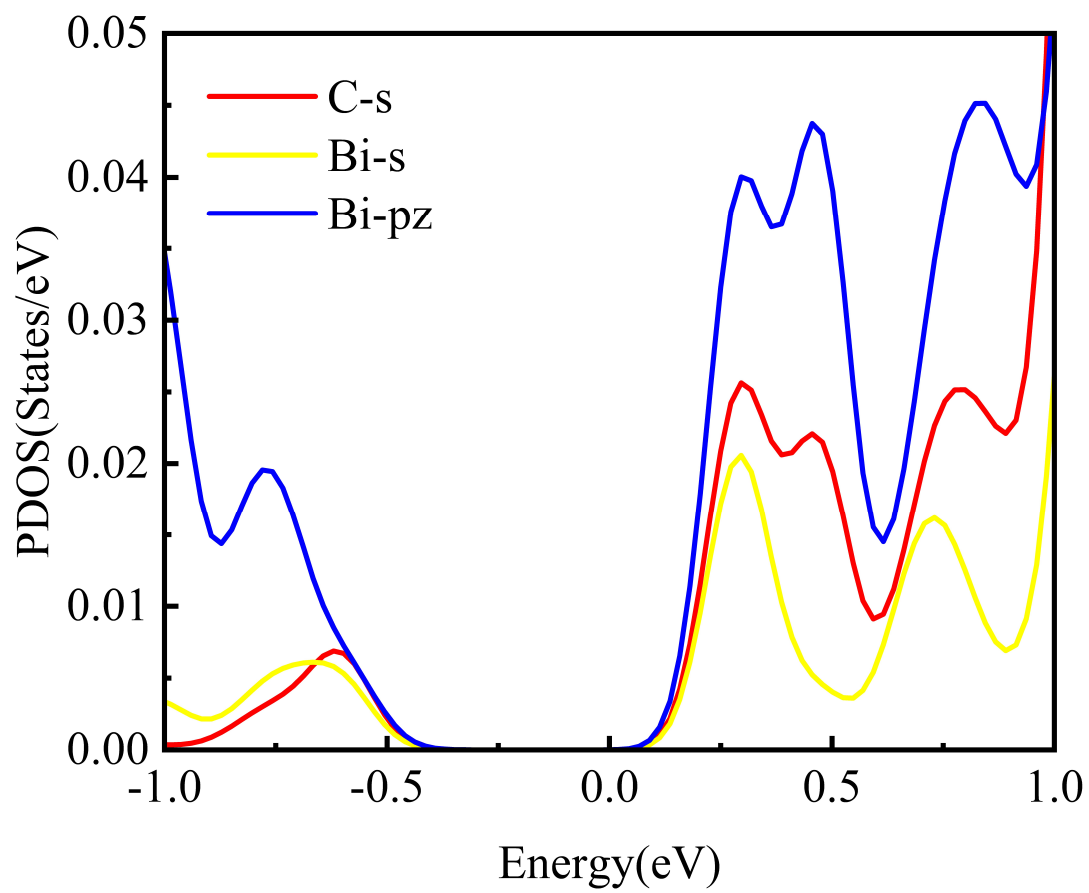

**Figure S11.** PDOS of the constituent atoms within the ZrSeCAsBi system.
